# Supplementary material for: Effectiveness of a Standardized Nursing Process Using NANDA International, Nursing Interventions Classification and Nursing Outcome Classification Terminologies: A Systematic Review
Source: MDPI journal article supplement (doi:10.3390/healthcare11172449), 2023-09-01
Supplement: s1 [file s1]

## 1. Search notebook

- **Medline (12 January 2021)**

| No. | Search strategy                                                                                                                  | Results |
|-----|----------------------------------------------------------------------------------------------------------------------------------|---------|
| #5  | (#4) AND ([english]/lim OR [portuguese]/lim OR [spanish]/lim) AND [1992-2021]/py AND ([medline]/lim OR [pubmed-not-medline]/lim) | 719     |
| #4  | (#3) AND ([english]/lim OR [portuguese]/lim OR [spanish]/lim) AND [1992-2021]/py                                                 | 783     |
| #3  | #1 OR #2                                                                                                                         | 800     |
| #2  | 'nursing interventions classification' OR 'nursing outcomes classification' OR 'nanda international' OR 'nnn terminology':ab,ti  | 800     |
| #1  | 'nursing interventions classification'/mj OR 'nursing outcomes classification'/mj OR 'nanda international'/mj                    | 67      |

- **Embase (12 January 2021)**

| No. | Search strategy                                                                                                                 | Results |
|-----|---------------------------------------------------------------------------------------------------------------------------------|---------|
| #5  | (#4) AND ([english]/lim OR [portuguese]/lim OR [spanish]/lim) AND [1992-2021]/py AND [embase]/lim                               | 104     |
| #4  | (#3) AND ([english]/lim OR [portuguese]/lim OR [spanish]/lim) AND [1992-2021]/py                                                | 783     |
| #3  | #1 OR #2                                                                                                                        | 800     |
| #2  | 'nursing interventions classification' OR 'nursing outcomes classification' OR 'nanda international' OR 'nnn terminology':ab,ti | 800     |
| #1  | 'nursing interventions classification'/mj OR 'nursing outcomes classification'/mj OR 'nanda international'/mj                   | 67      |

- **SCI-EXPANDED (12 January 2021)**

| No. | Search strategy                                                                                                                                                                                                                                                                                                                                                                                                                              | Results |
|-----|----------------------------------------------------------------------------------------------------------------------------------------------------------------------------------------------------------------------------------------------------------------------------------------------------------------------------------------------------------------------------------------------------------------------------------------------|---------|
| #2  | TEMA: ('nursing interventions classification' OR 'nursing outcomes classification' OR 'nanda international' OR 'nnn terminology') OR TÍTULO: ('nursing interventions classification' OR 'nursing outcomes classification' OR 'nanda international' OR 'nnn terminology')<br><br>Refinado por: IDIOMAS: (ENGLISH OR PORTUGUESE OR SPANISH) AND ÁREAS DE INVESTIGACIÓN: (NURSING)<br><br>Índices=SCI-EXPANDED Período de tiempo=Todos los años | 593     |
| #1  | TEMA: ('nursing interventions classification' OR 'nursing outcomes classification' OR 'nanda international' OR 'nnn terminology') OR TÍTULO: ('nursing interventions classification' OR 'nursing outcomes classification' OR 'nanda international' OR 'nnn terminology')<br><br>Índices=SCI-EXPANDED Período de tiempo=Todos los años                                                                                                        | 1.509   |

- **SCIELO (12 January 2021)**

| No. | Search strategy                                                                                                                                                                                                                                                                                                                                                                        | Results |
|-----|----------------------------------------------------------------------------------------------------------------------------------------------------------------------------------------------------------------------------------------------------------------------------------------------------------------------------------------------------------------------------------------|---------|
| #2  | TEMA: ('nursing interventions classification' OR 'nursing outcomes classification' OR 'nanda international' OR 'nnn terminology') OR TÍTULO: ('nursing interventions classification' OR 'nursing outcomes classification' OR 'nanda international' OR 'nnn terminology')<br><br>Refinado por: ÁREAS DE INVESTIGACIÓN: (NURSING)<br><br>Índices=SCIELO Período de tiempo=Todos los años | 272     |
| #1  | TEMA: ('nursing interventions classification' OR 'nursing outcomes classification' OR 'nanda international' OR 'nnn terminology') OR TÍTULO: ('nursing interventions classification' OR 'nursing outcomes classification' OR 'nanda international' OR 'nnn terminology')<br><br>Índices=SCIELO Período de tiempo=Todos los años                                                        | 294     |

- **Cochrane (12 January 2021)**

| No. | Search strategy                                                                                                                                                            | Results |
|-----|----------------------------------------------------------------------------------------------------------------------------------------------------------------------------|---------|
| #1  | ("nursing interventions classification" OR "nursing outcomes classification" OR "nanda international" OR "nnn terminology"):ti,ab,kw (Word variations have been searched)" | 31      |
| #2  | MeSH descriptor: [Standardized Nursing Terminology] this term only                                                                                                         | 1       |
| #3  | #1 OR #2<br>with Cochrane Library publication date from Jan 1992 to Jan 2021                                                                                               | 31      |

- **CINAHL (12 January 2021)**

| No. | Search strategy                                                                                                                                                                                                                                                  | Results |
|-----|------------------------------------------------------------------------------------------------------------------------------------------------------------------------------------------------------------------------------------------------------------------|---------|
| S3  | S1 OR S2 <b>Limitadores</b> - Fecha de publicación: 19920101-20210131; Idioma: English, Portuguese, Spanish                                                                                                                                                      | (1,326) |
| S2  | TI ('nursing interventions classification' OR 'nursing outcomes classification' OR 'nanda international' OR 'nnn terminology') OR AB ('nursing interventions classification' OR 'nursing outcomes classification' OR 'nanda international' OR 'nnn terminology') | (1,291) |
| S1  | (MM "NANDA International")                                                                                                                                                                                                                                       | (158)   |

- **Scopus (12 January 2021)**

| No. | Search strategy                                                                                                                                                                                                                                                                                                        | Results |
|-----|------------------------------------------------------------------------------------------------------------------------------------------------------------------------------------------------------------------------------------------------------------------------------------------------------------------------|---------|
| #1  | TITLE-ABS-KEY ("nursing interventions classification" OR "nursing outcomes classification" OR "nanda international" OR "nnn terminology") AND (EXCLUDE (PUBYEAR, 1985)) AND (LIMIT-TO (SUBJAREA, "NURS")) AND (LIMIT-TO (LANGUAGE, "English")) OR LIMIT-TO (LANGUAGE, "Portuguese") OR LIMIT-TO (LANGUAGE, "Spanish")) | 688     |

- **LILACS 13 (January 2021)**

| No. | Search strategy                                                                                                                                                                                                                                                             | Results |
|-----|-----------------------------------------------------------------------------------------------------------------------------------------------------------------------------------------------------------------------------------------------------------------------------|---------|
| #1  | (mh:("Standardized Nursing Terminology" OR "Nursing Diagnosis/classification" OR "NANDA International" )) OR (ti:(NANDA OR "Diagnostico enfermero" OR "Standardized Nursing Terminology")) OR (ab:(NANDA OR "Diagnostico enfermero" OR "Standardized Nursing Terminology")) | 722     |

- **Tripdatabase (12 January 2021)**

56 result for "nursing interventions classification" OR "nursing outcomes classification" OR "nanda international" OR "nnn terminology"
