# Supplementary material for: Effectiveness of a Standardized Nursing Process Using NANDA International, Nursing Interventions Classification and Nursing Outcome Classification Terminologies: A Systematic Review
Source: MDPI journal article supplement (doi:10.3390/healthcare11172449), 2023-09-01
Supplement: s1 [file s1]

## Testing notebook

EMTREE (Embase):

**Nursing terminology:** EMTREE term (Embase); MeSH term (Medline): “Standardized Nursing Terminology”

Note: I would use these which are more specific and have to do more specifically with the study:

- **NANDA international:** NANDA taxonomy; NANDA Classification; NANDA Diagnoses; NANDA Diagnose; NANDA Nursing Diagnoses; NANDA Nursing Diagnose; NANDA Terminologie; NANDA-I (NANDA international)
- **Nursing outcomes classification:** NOC (nursing outcomes classification); nursing outcome classification
- **Nursing interventions classification:** NIC (nursing interventions classification); nursing intervention classification

Possible terms drawn from the results of different tests (authors' keywords, database suggestions, etc.):

- outcome assessment,
- health care management,
- health care planning,
- health care policy,
- home health care classification,
- information processing,
- interdisciplinary communication,
- international classification for nursing practice,
- medical education,
- nursing care,
- nursing diagnosis,
- nursing interventions classification,
- nursing outcomes classification,
- nursing research,
- Omaha system,
- patient care,
- perioperative nursing

### **Embase Session Results (1 Feb 2020)**

#### **TEST 1:**

|    |                                                       |        |
|----|-------------------------------------------------------|--------|
| #4 | #2 AND #3                                             | 1248   |
| #3 | nurs*:ab,ti                                           | 524287 |
| #2 | nanda OR nic OR noc:ab,ti                             | 29521  |
| #1 | 'nanda international':ab,ti OR nic:ab,ti OR noc:ab,ti | 4398   |

**TEST 2:**

|    |                                                                                                               |            |
|----|---------------------------------------------------------------------------------------------------------------|------------|
| #3 | #1 OR #2                                                                                                      | <b>458</b> |
| #2 | 'nursing interventions classification' OR 'nursing outcomes classification' OR 'nanda international':ab,ti    | <b>450</b> |
| #1 | 'nursing interventions classification'/mj OR 'nursing outcomes classification'/mj OR 'nanda international'/mj | <b>45</b>  |

**TEST: 3**

Note: I did the same as in test 2 but added the terms "NNN terminology" and "NNN". It retrieved much more than double the previous results, I did a new test including only these two terms (row #4. I am sending a spreadsheet with the first 100 references, in case you want to check what comes out). As there is so much difference between the results that include these 2 terms (row #3) and those that do not (row #3 of TEST 2), I decided to check what would happen if I removed from the results all together, the references related to these 2 terms (row #4). There are about 200 references that come up even if the terms in row #4 are not used, suggesting that they are relevant references; the rest up to 909 could be noise (non-relevant references). As there were so many, I decided to do another check: I selected, from the results of row #4, a reference addressing the NANDA-NIC-NOC topic row #6 and asked for all references in row #3 except this row #7. Positive result. This suggests to me that we should remove the acronym "NNN", because reviewing the results of #4, I found that this acronym is also used for other terms such as "National neuroblastoma network" and "N'-nitrosomornicotine".

|    |                                                                                                                                        |             |
|----|----------------------------------------------------------------------------------------------------------------------------------------|-------------|
| #7 | #3 NOT #6                                                                                                                              | <b>1619</b> |
| #6 | 'cross-mapping of nursing care terms recorded in italian hospitals into the standardized nnn terminology':ti                           | <b>1</b>    |
| #5 | #3 NOT #4                                                                                                                              | <b>711</b>  |
| #4 | 'nnn terminology' OR nnn:ab,ti                                                                                                         | <b>909</b>  |
| #3 | #1 OR #2                                                                                                                               | <b>1620</b> |
| #2 | 'nursing interventions classification' OR 'nursing outcomes classification' OR 'nanda international' OR 'nnn terminology' OR nnn:ab,ti | <b>1351</b> |
| #1 | 'nursing interventions classification'/mj OR 'nursing outcomes classification'/mj OR 'nanda international'/mj                          | <b>45</b>   |

**Embase Session Results (3 Feb 2020)****TEST: 4**

Note: I took the outcomes group terms from the PICO structure and used them to narrow down the results of row #3 (I removed "NNN" from the search equation). It seems to me that they restrict too much... We could give a further twist to the terms in the group of rows #3-#6 or, considering that there is not too much on NANDA-NIC-NOC, use only these terms (row #3).

|    |                                                                                                                                 |              |
|----|---------------------------------------------------------------------------------------------------------------------------------|--------------|
| #8 | #3 AND #7                                                                                                                       | <b>20</b>    |
| #7 | OR/ #4-6                                                                                                                        | <b>66969</b> |
| #6 | 'nursing intervention'/mj                                                                                                       | <b>520</b>   |
| #5 | ((diagnostic OR intervention) NEAR/1 accuracy):ab,ti                                                                            | <b>61336</b> |
| #4 | 'diagnostic accuracy'/mj                                                                                                        | <b>11732</b> |
| #3 | #1 OR #2                                                                                                                        | <b>727</b>   |
| #2 | 'nursing interventions classification' OR 'nursing outcomes classification' OR 'nanda international' OR 'nnn terminology':ab,ti | <b>727</b>   |
| #1 | 'nursing interventions classification'/mj OR 'nursing outcomes classification'/mj OR 'nanda international'/mj                   | <b>45</b>    |
