# Supplementary material for: Effectiveness of a Standardized Nursing Process Using NANDA International, Nursing Interventions Classification and Nursing Outcome Classification Terminologies: A Systematic Review
Source: MDPI journal article supplement (doi:10.3390/healthcare11172449), 2023-09-01
Supplement: s1 [file s1]

**Table S1:** Interobserver agreement on included studies

| Author (year)                          | Kappa coefficient | p-value | Confidence Interval |
|----------------------------------------|-------------------|---------|---------------------|
| Corcoles et al. (2021) [12]            | 1.000             | 0.003   | 1.000 – 1.000       |
| Guerra et al. (2021) [13]              | 0.270             | 0.230   | -0.191 – 0.731      |
| Lemos et al. (2020) [25]               | 0.571             | 0.058   | 0.098 – 1.045       |
| Rembold et al. (2020) [26]             | 0.357             | 0.284   | -0.361 – 1.076      |
| Silva et al. (2020) [16]               | 0.357             | 0.284   | -0.361 – 1.076      |
| Bjorklund-Lima et al. (2019) [24]      | 0.609             | 0.047   | -0.057 – 1.274      |
| Pascoal et al. (2019) [17]             | 1.000             | 0.003   | 1.000 – 1.000       |
| Silva et al. (2019) [18]               | 1.000             | 0.003   | 1.000 – 1.000       |
| Vázquez-Sánchez et al. (2019) [27]     | 0.088             | 0.708   | -0.297 – 0.047      |
| Gencbas et al. (2018) [14]             | 1.000             | 0.003   | 1.000 – 1.000       |
| Sampaio et al. (2018) [15]             | 1.000             | 0.003   | 1.000 – 1.000       |
| Pascoal et al. (2016) [19]             | 0.088             | 0.708   | -0.297 – 0.047      |
| Reis & Jesus (2015) [20]               | 0.088             | 0.708   | -0.297 – 0.047      |
| Pascoal et al. (2014) [21]             | 0.727             | 0.023   | 0.242 – 1.212       |
| Laguna-Parras et al. (2013) [28]       | 1.000             | 0.003   | 1.000 – 1.000       |
| Cárdenas-Valladolid et al. (2012) [22] | 0.127             | 0.571   | -0.423 – 0.076      |
| Müller-Staub et al. (2008) [23]        | 1.000             | 0.003   | 1.000 – 1.000       |

**Table S2:** Critical reading scores for the included studies

| Author (year)                      | Methods            | Q1 | Q2 | Q3 | Q4 | Q5 | Q6 | Q7 | Q8 | Q9 | Q10 | Q11 | Score |
|------------------------------------|--------------------|----|----|----|----|----|----|----|----|----|-----|-----|-------|
| Corcoles et al. (2021) [12]        | RCT                | Y  | Y  | Y  | Y  | Y  | Y  | NA | NA | Y  | Y   | Y   | 9/11  |
| Guerra et al. (2021) [13]          | RCT                | Y  | Y  | Y  | Y  | Y  | Y  | NA | NA | Y  | Y   | Y   | 9/11  |
| Lemos et al. (2020) [25]           | Quasi-experimental | Y  | N  | Y  | N  | N  | Y  | NA | NA | Y  | Y   | Y   | 6/11  |
| Rembold et al. (2020) [26]         | Case control       | Y  | Y  | Y  | Y  | Y  | D  | NA | NA | Y  | Y   | D   | 7/11  |
| Silva et al. (2020) [16]           | Cohort             | Y  | Y  | Y  | Y  | Y  | NA | NA | Y  | Y  | Y   | N   | 8/11  |
| Bjorklund-Lima et al. (2019) [24]  | Cohort             | Y  | Y  | Y  | Y  | Y  | NA | NA | Y  | N  | Y   | Y   | 8/11  |
| Pascoal et al. (2019) [17]         | Cohort             | Y  | Y  | Y  | D  | Y  | NA | NA | Y  | Y  | Y   | N   | 7/11  |
| Silva et al. (2019) [18]           | Quasi-experimental | Y  | N  | Y  | N  | N  | Y  | NA | NA | Y  | Y   | Y   | 6/11  |
| Vázquez-Sánchez et al. (2019) [27] | RCT                | Y  | Y  | D  | Y  | Y  | Y  | NA | NA | Y  | Y   | Y   | 8/11  |
| Gencbas et al. (2018) [14]         | Pseudo RCT         | Y  | Y  | Y  | Y  | Y  | Y  | NA | NA | Y  | Y   | Y   | 9/11  |
| Sampaio et al.                     | RCT                | Y  | Y  | Y  | Y  | Y  | Y  | NA | NA | Y  | Y   | Y   | 9/11  |

|                                        |                    |     |      |      |      |      |    |    |     |      |     |      |      |
|----------------------------------------|--------------------|-----|------|------|------|------|----|----|-----|------|-----|------|------|
| (2018) [15]                            |                    |     |      |      |      |      |    |    |     |      |     |      |      |
| Pascoal et al. (2016) [19]             | Cohort             | Y   | Y    | Y    | D    | Y    | NA | NA | Y   | Y    | Y   | N    | 7/11 |
| Reis & Jesus (2015) [20]               | Cohort             | Y   | Y    | Y    | D    | Y    | NA | NA | Y   | D    | Y   | N    | 6/11 |
| Pascoal et al. (2014) [21]             | Cohort             | Y   | Y    | Y    | D    | D    | NA | NA | Y   | N    | Y   | Y    | 6/11 |
| Laguna-Parras et al. (2013) [28]       | Quasi-experimental | Y   | N    | Y    | N    | N    | Y  | NA | NA  | Y    | Y   | Y    | 6/11 |
| Cárdenas-Valladolid et al. (2012) [22] | Cohort             | Y   | Y    | D    | Y    | Y    | NA | NA | Y   | Y    | Y   | Y    | 8/11 |
| Müller-Staub et al. (2008) [23]        | RCT                | Y   | Y    | Y    | D    | Y    | Y  | NA | NA  | Y    | Y   | Y    | 8/11 |
| Percentage Y                           |                    | 100 | 8.33 | 88.8 | 55.5 | 77.7 | 90 | NA | 100 | 88.8 | 100 | 70,5 |      |

*RCT/Quasi-experimental* (Q1: Was the trial guided by a clearly defined question?; Q2: Was the allocation of patients to treatments random?; Q3: Were all the patients who took part adequately considered until completion of the study?; Q4: Was blinding maintained?; Q5: Were groups similar on study commencement?; Q6: Were the groups treated equally regardless of the study intervention?; Q7: Was the treatment effect large?; Q8: How accurate was this effect?; Q9: Can these results be applied to your setting or local population?; Q10: Were all clinically important results taken into account?; Q11: Do the benefits obtained justify the risks and costs?)

*Cohort* (Q1: Was the study focused on a clearly defined topic?; Q2: Was the cohort recruited in the most appropriate way?; Q3: Was the outcome measured accurately with the aim of minimizing potential bias?; Q4: Did the authors take into account the potential effect of confounding factors in the design and/or analysis of the study?; Q5: Was subject follow-up complete and of sufficient duration?; Q6: What are the results of the study?; Q7: How accurate are the results?; Q8: Do the outcomes appear credible?; Q9: Are the study results in line with other available evidence?; Q10: Can the results be applied in your setting?; Q11: Is this going to alter your clinical decision?)

*Case-control* (Q1: Was the study focused on a clearly defined topic?; Q2: Did the authors use an appropriate method to respond to the question?; Q3: Were the cases recruited/included in an acceptable way?; Q4: Were the controls selected in an acceptable way?; Q5: Was the exposure accurately measured to minimize possible biases?; Q6: What confounding factors did the authors take into account?; Q7: Did the authors take the potential for confounding factors into account in the design and/or analysis?; Q8: What is the accuracy of the results? What is the accuracy of the risk estimate?; Q9: Do you find the results credible?; Q10: Can the results be applied in your setting?; Q11: Are the results of this study in line with other available evidence?)

Y: Yes; N: No; NA: Not applicable.

**Table S3.** JBI level of evidence and degree of certainty using GRADE methodology

| Author; year                           | Methods            | Initial certainty | Risk of bias | Inconsistency | Indirectness | Imprecision | Publication bias | Magnitude of effect | Response gradient | Residual confounding | JBI evidence level | Final certainty |
|----------------------------------------|--------------------|-------------------|--------------|---------------|--------------|-------------|------------------|---------------------|-------------------|----------------------|--------------------|-----------------|
| Corcoles et al. (2021) [12]            | RCT                | ++++              | 0            | 0             | 0            | 0           | 0                | 1                   | 1                 | 0                    | 1c                 | ++++            |
| Guerra et al. (2021) [13]              | RCT                | ++++              | -1           | 0             | 0            | -1          | 0                | 0                   | 0                 | 0                    | 1c                 | ++              |
| Lemos et al. (2020) [25]               | Quasi-experimental | ++++              | 0            | 0             | 0            | -1          | 0                | 0                   | 0                 | 0                    | 2c                 | +++             |
| Rembold et al. (2020) [26]             | Case control       | ++                | -1           | 0             | 0            | 0           | 0                | 1                   | 1                 | 0                    | 3d                 | +++             |
| Silva et al. (2020) [16]               | Cohort             | ++                | 0            | 0             | 0            | 0           | 0                | 1                   | 1                 | 0                    | 3e                 | ++++            |
| Bjorklund-Lima et al. (2019) [24]      | Cohort             | ++                | 0            | 0             | 0            | 0           | 0                | 0                   | 0                 | 0                    | 3e                 | ++              |
| Pascoal et al. (2019) [17]             | Cohort             | ++                | 0            | 0             | 0            | 0           | 0                | 1                   | 1                 | 0                    | 3e                 | ++++            |
| Silva et al. (2019) [18]               | Quasi-experimental | ++++              | -2           | 0             | 0            | 0           | 0                | 1                   | 1                 | 0                    | 2c                 | ++++            |
| Vázquez-Sánchez et al. (2019) [27]     | RCT                | ++++              | 0            | 0             | -1           | -1          | 0                | 0                   | 0                 | 0                    | 1c                 | ++              |
| Gencbas et al. (2018) [14]             | Pseudo RCT         | ++++              | -1           | 0             | -1           | -1          | 0                | 0                   | 0                 | 0                    | 1d                 | +               |
| Sampaio et al. (2018) [15]             | RCT                | ++++              | -1           | 0             | -1           | -1          | 0                | 0                   | 1                 | 0                    | 1c                 | ++              |
| Pascoal et al. (2016) [19]             | Cohort             | ++                | 0            | 0             | 0            | 0           | 0                | 1                   | 1                 | 0                    | 3e                 | ++++            |
| Reis & Jesus (2015) [20]               | Cohort             | ++                | 0            | 0             | 0            | 0           | 0                | 1                   | 1                 | 0                    | 3e                 | ++++            |
| Pascoal et al. (2014) [21]             | Cohort             | ++                | 0            | 0             | 0            | 0           | 0                | 1                   | 1                 | 0                    | 3e                 | ++++            |
| Laguna-Parras et al. (2013) [28]       | Quasi-experimental | ++++              | -1           | 0             | 0            | 0           | 0                | 0                   | 0                 | 0                    | 2d                 | +++             |
| Cárdenas-Valladolid et al. (2012) [22] | Cohort             | ++                | 0            | 0             | -1           | 0           | 0                | 1                   | 0                 | 0                    | 3c                 | ++              |
| Müller-Staub et al. (2008) [23]        | RCT                | ++++              | 0            | 0             | -1           | -1          | 0                | 0                   | 0                 | 0                    | 1c                 | ++              |
